# Supplementary material for: Stable solid-state potassium metal batteries enabled by a KB11H14·2Me3NBH3 complex electrolyte
Source: Royal Society of Chemistry journal article supplement (doi:10.1039/d4qi02372b), 2024-01-01
Supplement: d4qi02372b1.pdf [file d4qi02372b1.pdf]

## Supporting Information

# Stable Solid-State Potassium Metal Batteries Enabled by a $\text{KB}_{11}\text{H}_{14}\cdot 2\text{Me}_3\text{NBH}_3$ Complex Electrolyte

*Guo-guo Zhang,<sup>a</sup> Pengtao Qiu, \*<sup>a</sup> Jia-Xin Kang,<sup>a, b</sup> Zhiwei Lu,<sup>c</sup> An-qi Zhu,<sup>a</sup> Xiaohu Yu,<sup>d</sup> and Xuenian Chen\*<sup>a, c</sup>*

<sup>a</sup> Henan Key Laboratory of Boron Chemistry and Advanced Materials, School of Chemistry and Chemical Engineering, Henan Normal University, Xinxiang, Henan 453007, China.

<sup>b</sup> Department of Chemistry and Guangdong Provincial Key Laboratory of Catalytic Chemistry, Southern University of Science and Technology, Shenzhen 518055, China.

<sup>c</sup> College of Chemistry, Zhengzhou University, Zhengzhou, Henan 450001, China.

<sup>d</sup> Shaanxi Province Key Laboratory of Catalytic Fundamental & Application, Shaanxi University of Technology, Hanzhong 723000, China.

\*Emails: [xuenian\\_chen@zzu.edu.cn](mailto:xuenian_chen@zzu.edu.cn) (X.C.) and [qiupengtao@htu.edu.cn](mailto:qiupengtao@htu.edu.cn) (P.Q.).

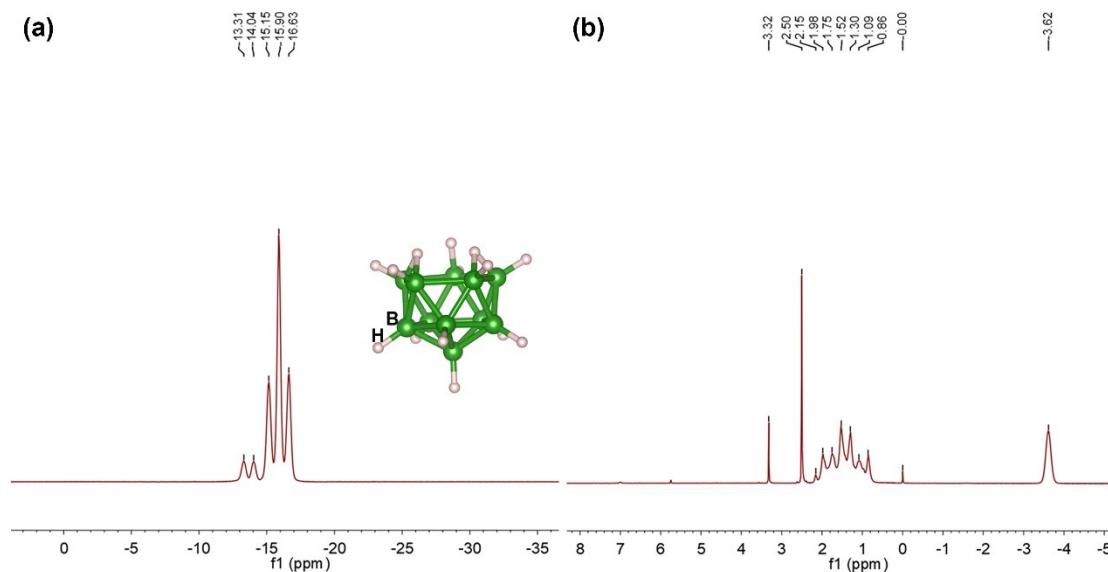

**Fig. S1** (a)  $^{11}\text{B}$  NMR and (b)  $^1\text{H}$  NMR spectra of  $\text{KB}_{11}\text{H}_{14}$  in  $\text{DMSO-d}_6$ .

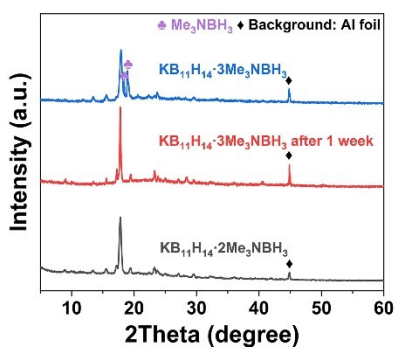

**Fig. S2** XRD pattern of the  $\text{KB}_{11}\text{H}_{14}\cdot 3\text{Me}_3\text{NBH}_3$  sample after standing one week at room temperature compared to those of the  $\text{KB}_{11}\text{H}_{14}\cdot n\text{Me}_3\text{NBH}_3$  ( $n = 2$  and  $3$ ) samples.

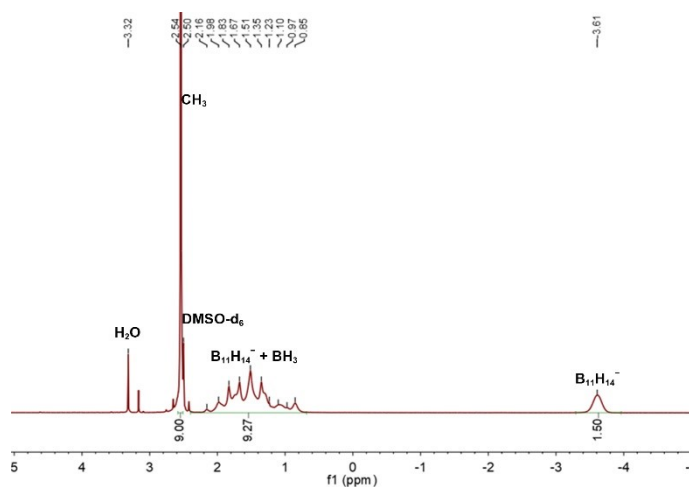

**Fig. S3**  $^1\text{H}$  NMR spectrum of  $\text{KB}_{11}\text{H}_{14}\cdot 2\text{Me}_3\text{NBH}_3$  in  $\text{DMSO-d}_6$ .

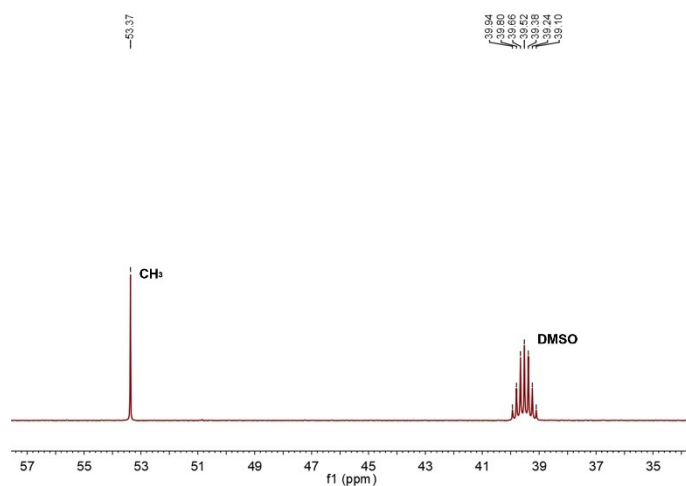

**Fig. S4**  $^{13}\text{C}$  NMR spectrum of  $\text{KB}_{11}\text{H}_{14}\cdot 2\text{Me}_3\text{NBH}_3$  in  $\text{DMSO-d}_6$ .

**Table S1.** Crystallographic data for  $\text{KB}_{11}\text{H}_{14}\cdot 2\text{Me}_3\text{NBH}_3$  and  $\text{KB}_{11}\text{H}_{14}$ .

|                                | $\text{KB}_{11}\text{H}_{14}\cdot 2\text{Me}_3\text{NBH}_3$ | $\text{KB}_{11}\text{H}_{14}$ <sup>[1]</sup> |
|--------------------------------|-------------------------------------------------------------|----------------------------------------------|
| <b>Crystal system</b>          | Monoclinic                                                  | Triclinic                                    |
| <b>Space group</b>             | $P2_1/c$                                                    | $P$                                          |
| <b>T (°C)</b>                  | 25                                                          | 25                                           |
| <b>a (Å)</b>                   | 7.0592                                                      | 7.1950                                       |
| <b>b (Å)</b>                   | 20.1141                                                     | 7.0462                                       |
| <b>c (Å)</b>                   | 12.4673                                                     | 19.4087                                      |
| <b><math>\alpha</math> (°)</b> | 90.000                                                      | 90.719                                       |
| <b><math>\beta</math> (°)</b>  | 106.645                                                     | 94.045                                       |
| <b><math>\gamma</math> (°)</b> | 90.000                                                      | 89.971                                       |
| <b>V (Å<sup>3</sup>)</b>       | 1696.06                                                     | 981.44                                       |

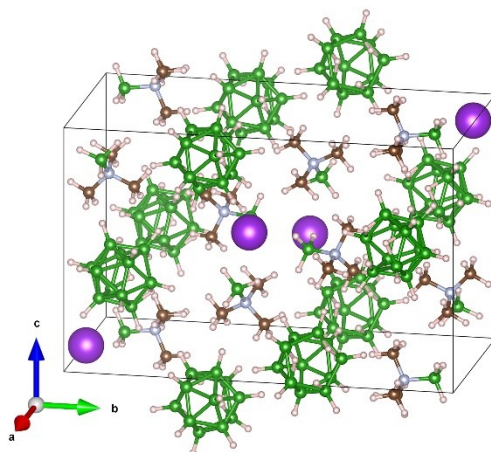

**Fig. S5** Crystal structure of the  $\text{KB}_{11}\text{H}_{14}\cdot 2\text{Me}_3\text{NBH}_3$  complex after the structure optimizations using the VASP package. Color scheme: K (purple), B (green), C (brown), N(white), and H (pink).

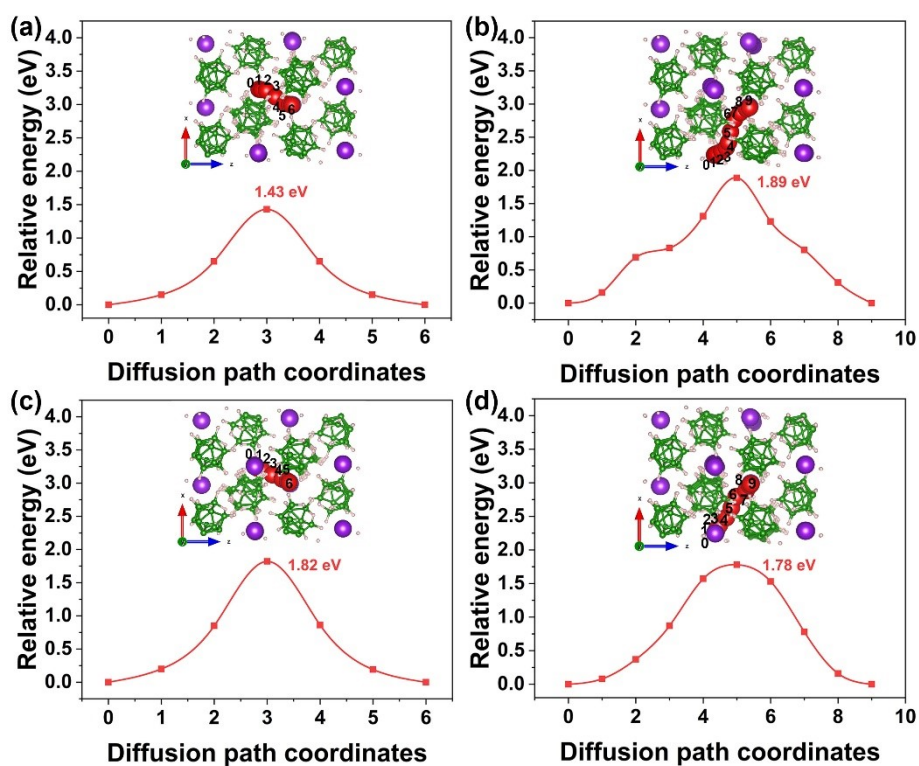

**Fig. S6** Energy barriers of  $\text{K}^+$  migration by the vacancy diffusion mechanism along other possible migration channels in a  $2 \times 2 \times 1$  supercell of  $\text{KB}_{11}\text{H}_{14}$ , insets: the migration channels. Color scheme: Framework K (purple), B (green), and H (pink).

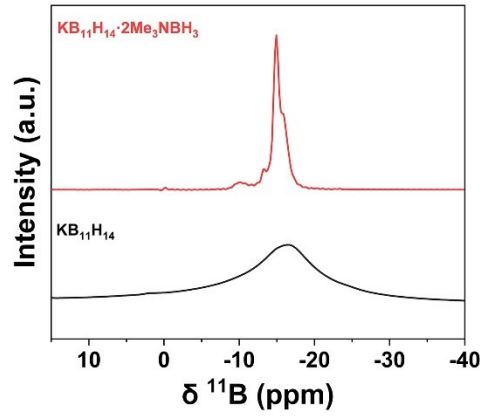

Fig. S7 Solid-state  $^{11}\text{B}$  MAS NMR spectra of  $\text{KB}_{11}\text{H}_{14}$  and  $\text{KB}_{11}\text{H}_{14}\cdot 2\text{Me}_3\text{NBH}_3$  at RT.

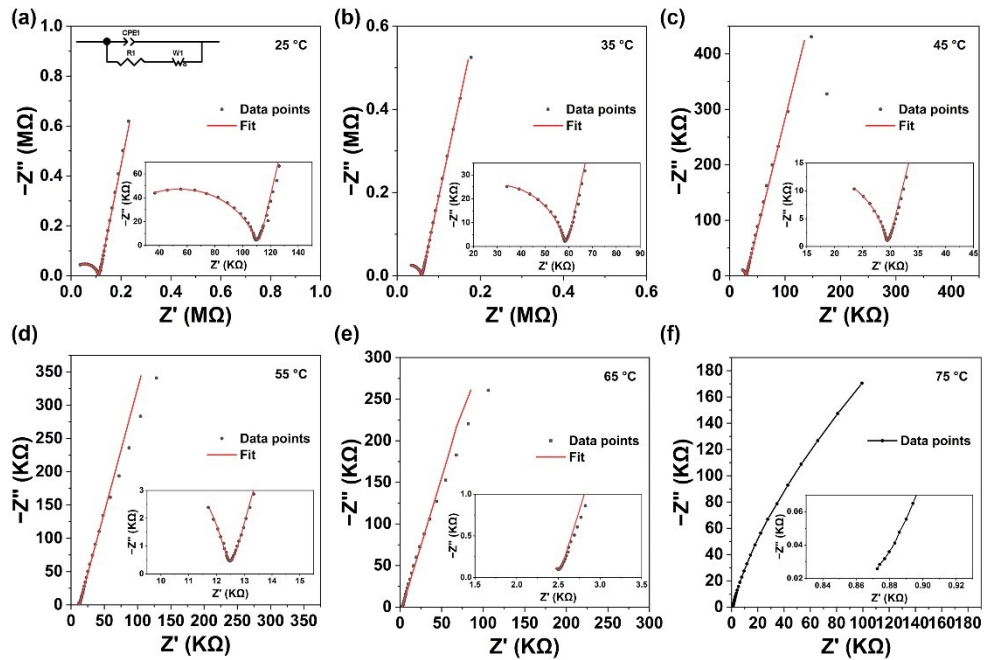

Fig. S8 (a-e) Nyquist plots of  $\text{KB}_{11}\text{H}_{14}\cdot 2\text{Me}_3\text{NBH}_3$  at different temperatures fitted with an equivalent circuit model (inset of a). (f) Nyquist plot at 75 °C, the intercept from  $Z'$ -axis was used to determine the value of resistance.

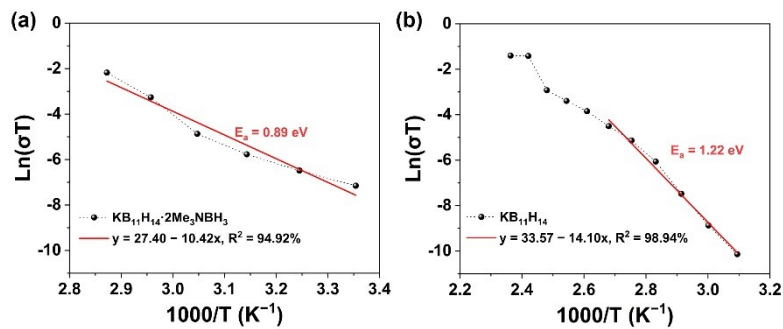

Fig. S9 The activation energies for  $\text{K}^+$  diffusion in (a)  $\text{KB}_{11}\text{H}_{14}\cdot 2\text{Me}_3\text{NBH}_3$  and (b)  $\text{KB}_{11}\text{H}_{14}$ .

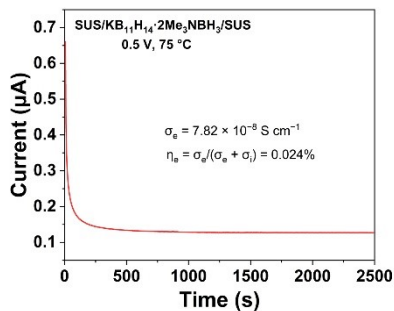

**Fig. S10** CA curve of a SUS/KB<sub>11</sub>H<sub>14</sub>·2Me<sub>3</sub>NBH<sub>3</sub>/SUS cell under a voltage of 0.5 V at 75 °C.

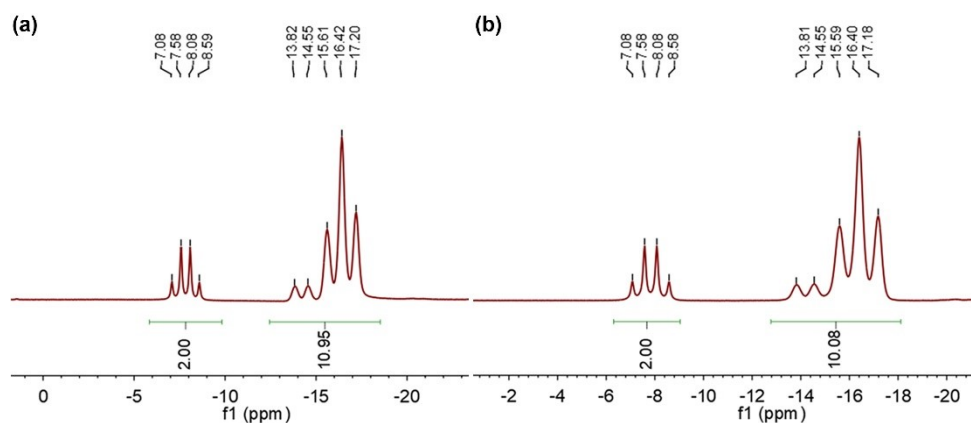

**Fig. S11** <sup>11</sup>B NMR spectra of the KB<sub>11</sub>H<sub>14</sub>·2Me<sub>3</sub>NBH<sub>3</sub> electrolytes after the LSV measurements within the potential windows of OCV to (a) 3.5 V and (b) 4 V at 45 °C.

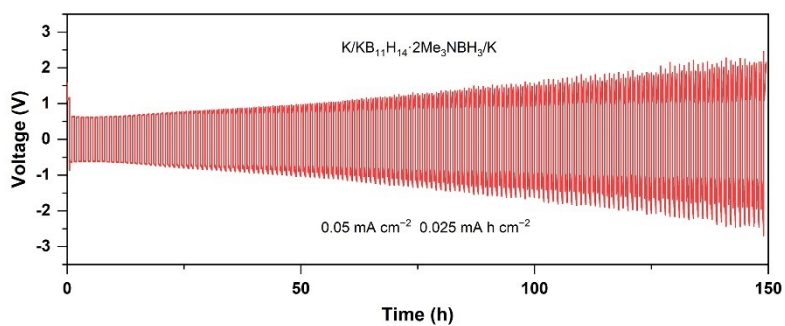

**Fig. S12** Constant current GC curve of a K/KB<sub>11</sub>H<sub>14</sub>·2Me<sub>3</sub>NBH<sub>3</sub>/K cell at a current density of 0.05 mA cm<sup>-2</sup>. Temperature: 45 °C.

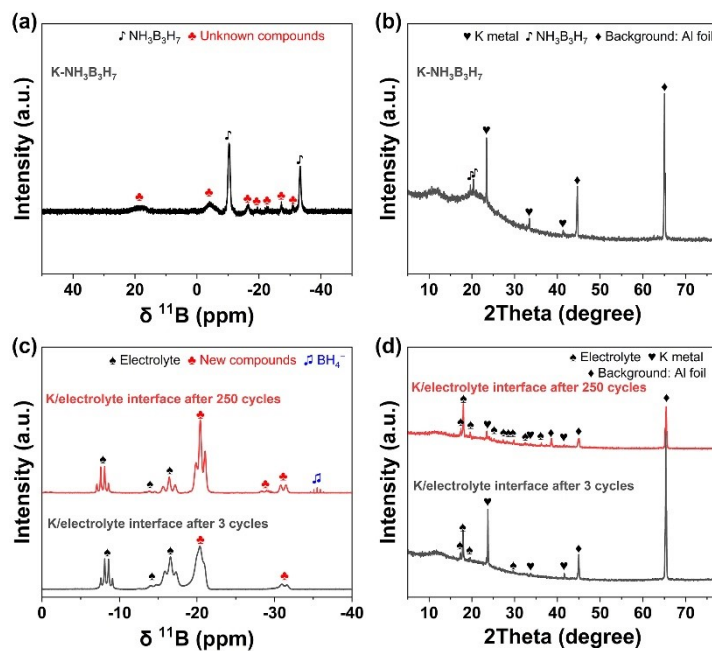

**Fig. S13** (a)  $^{11}\text{B}$  NMR and (b) XRD spectra of the preformed SEI layer in the  $\text{K-NH}_3\text{B}_3\text{H}_7$  electrode. (c)  $^{11}\text{B}$  NMR and (d) XRD spectra of the  $\text{K/electrolyte}$  interfaces in the symmetrical cell with the  $\text{K-NH}_3\text{B}_3\text{H}_7$  electrodes after the given cycles.

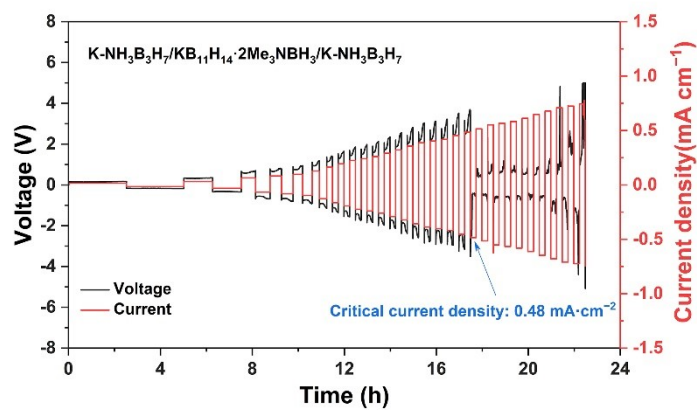

**Fig. S14** Stepped current GC curve of the  $\text{K-NH}_3\text{B}_3\text{H}_7/\text{KB}_{11}\text{H}_{14}\cdot 2\text{Me}_3\text{NBH}_3/\text{K-NH}_3\text{B}_3\text{H}_7$  cell. Temperature:  $45\text{ }^\circ\text{C}$ .

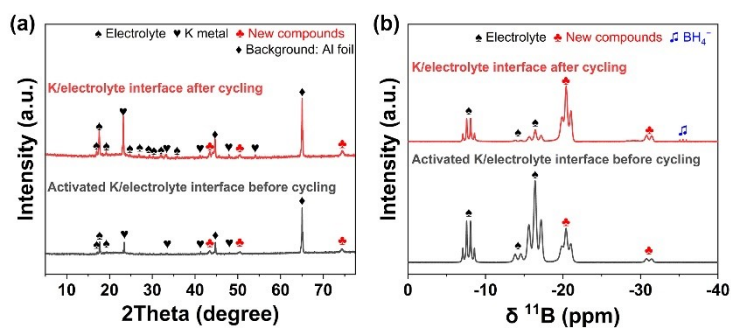

**Fig. S15** (a) XRD and (b)  $^{11}\text{B}$  NMR spectra of the K/electrolyte interfaces before and after galvanostatic charge/discharge cycling at 0.3 C.

### Supplementary References

1. D. H. P. Souza, K. T. Moller, S. A. Moggach, T. D. Humphries, A. M. D'Angelo, C. E. Buckley and M. Paskevicius, Hydrated Alkali- $\text{B}_{11}\text{H}_{14}$  Salts as Potential Solid-State Electrolytes, *J. Mater. Chem. A*, 2021, **9**, 15027-15037.
